# Supplementary material for: Molecular Screening and Characterization of Canine Coronavirus Types I and II Strains from Domestic Dogs in Southern Italy, 2019–2021
Source: Hindawi journal article supplement (doi:10.1155/2024/7272785), 2024-01-01
Supplement: f4 [file 7272785.f4.pdf]

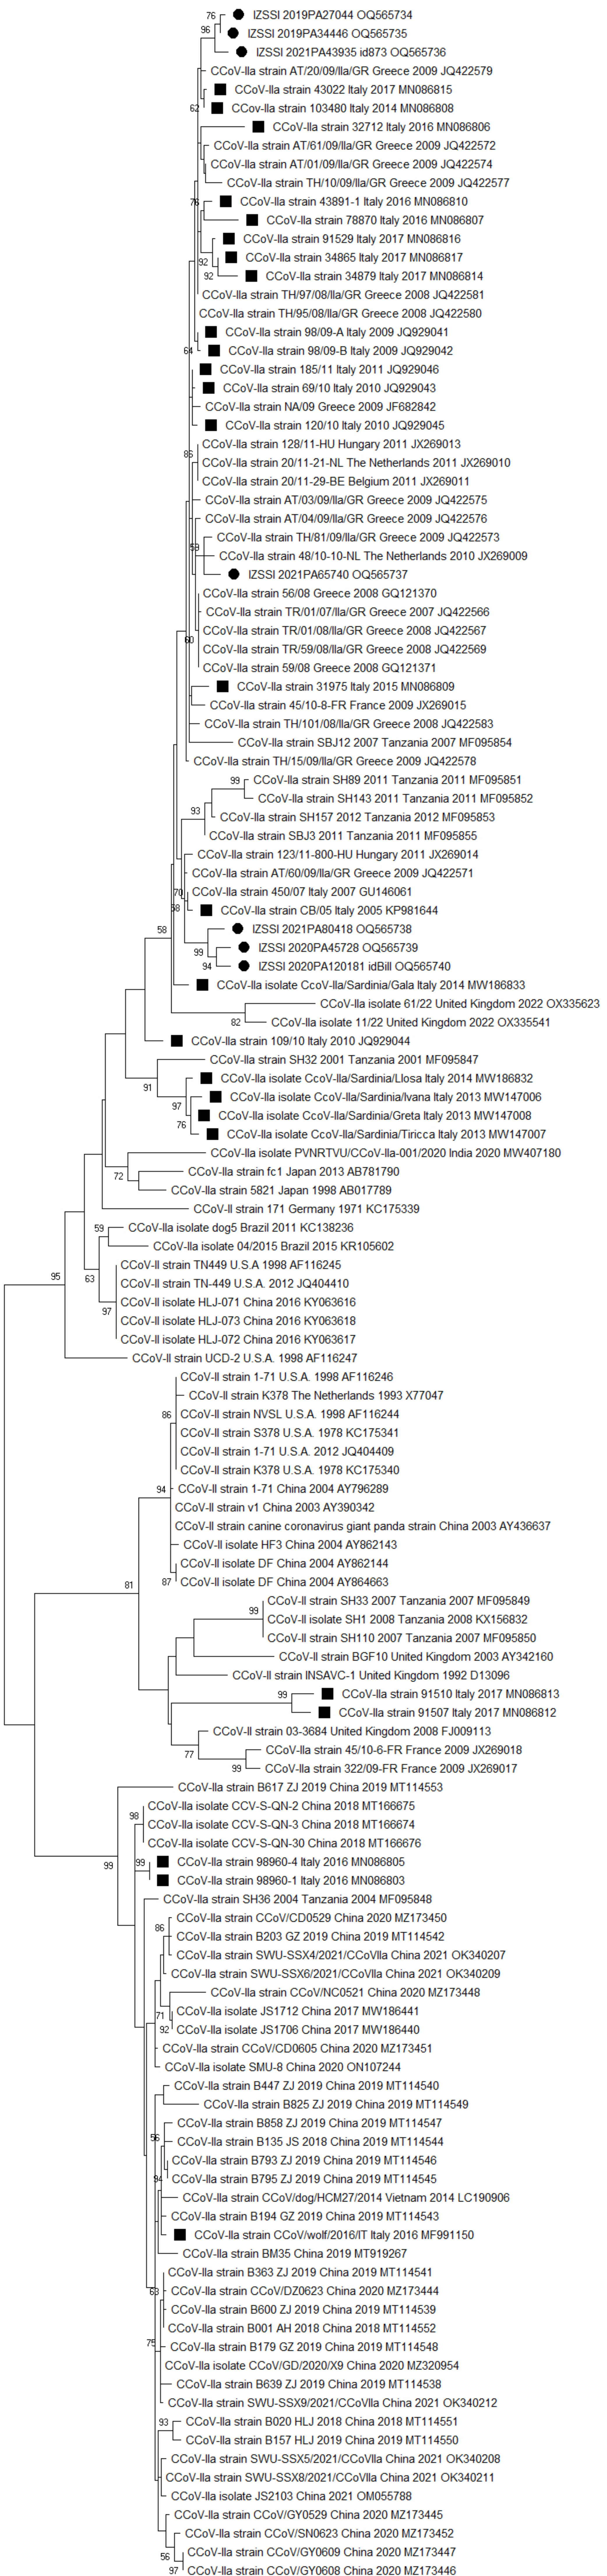

0.050
