# Supplementary material for: Molecular Screening and Characterization of Canine Coronavirus Types I and II Strains from Domestic Dogs in Southern Italy, 2019–2021
Source: Transbound Emerg Dis. 2024 Apr 18;2024:7272785. doi: 10.1155/2024/7272785 (PMC12016997; doi:10.1155/2024/7272785)
Supplement: Supplementary 2 — Sequences and positions of the primers used in gel-based RT-PCR assays of the present study. [file 7272785.f2.docx]

**Supplementary Table S2.** Sequences and positions of the primers used in gel-based RT-PCR assays of the present study.

| **Primer** | **Gene** | **CCoV type** | **Sequence (5’-3’)** | **Strand** | **Annealing**  **Temp (°C)** | **Amplicon**  **size (bp)** | **Reference** |
| --- | --- | --- | --- | --- | --- | --- | --- |
| CCV1a | M | I/II | TCCAGATATGTAATGTTCGG | + | 55°C | 409 | [14] |
| CCV2a | TCTGTTGAGTAATCACCAGCT | - |
| CCoV1ab | M | I | GTGCTTCCTCTTGAAGGTACA | + | 55°C | 239 | [26] |
| CCoV2b | TCTGTTGAGTAATCACCAGCT | - |
| Can1Fb | M | II | TAACATTGCTCTCAGGGAATTTG | + | 55°C | 202 |
| CCoV2b | TCTGTTGAGTAATCACCAGCT | - |
| EL1Fb | S | I | CAAGTTGACCGTCTTATTACTGGTAG | + | 55°C | 346 |
| EL1Rb | TCATATACGTACCATTATAGCTGAAGA | - |
| S5b,c | S | IIa | TGCATTTGTGTCTCAGACTT | + | 55°C | 694 |
| S6b,c | CCAAGGCCATTTTACATAAG | - |
| CEPol-1b,c | ORF1b | IIb | TCTACAATTATGGCTCTATCAC | + | 50°C | 370 | [27] |
| TGSP-2b,c | S | TAATCACCTAAMACCACATCTG | - |
| 20179c,e | ORF1b  S | IIa/IIb | GGCTCTATCACATAACTCAGTCCTAG | + | 55°C | 760 (CCoV-IIa)  498 (CCoV-IIb) | [15] |
| INS-R-dgc,e | IIa | GCTGTAACATAKTCRTCATTCCAC | - |
| 174-268c,e | IIb | CAACATGTAACCTTTGTCTGTGATCTGC | - |
| PolEndd | ORF1b | I | CTAAGGAAGGGTAAGTTGCTCA | + | 52°C | 1000 | [29] |
| 1060dRd | S | ATCAGCAGATGCTTGRGGACA | - |
| El-Ins1e | S | IIa | GGATTACTAARGADKGGTAAGTTGC | + | 50°C | 1631 | [30] |
| S2e | CAACTTCACTTGAAGCAACA | - |
| SIIFe | GCATTAGTAGTTGAAAACACAGC | + | 50°C | 1285 |
| SIIRe | TCAAGTCTGGCACCCATTG | - |
| S3e | GAGACTTTCAACCAATTAGC | + | 50°C | 1876 |
| UCD6Re | TTAATGAATGTGAACTTTTTCAATAGG | - |
| SF1e | S | II | ATGATTGTGCTTACATTGTGCC | + | 50°C | 1640 | [31] |
| SR1e | CCACTACGCTTCATACCAAGAT | - |
| SF2e | TCTTGGTATGAAGCGTAGTGG | + | 50°C | 1613 |
| SR2e | TACCAATAGCTTGATTGAAAGC | - |

Primers used for aCCoV screening, bCCoV I/II typing, cCCoV-IIa and CCoV-IIb subtyping, and dCCoV-I or eCCoV-II 5’-S gene sequencing.
